# Supplementary material for: Self-adhesive epidermal carbon nanotube electronics for tether-free long-term continuous recording of biosignals
Source: PubMed Central journal article supplement — Sci Rep. 2014 Aug 15;4:6074. doi: 10.1038/srep06074 (PMC4133715; doi:10.1038/srep06074), 2014-08-15
Supplement: srep06074-s1.pdf [file srep06074-s1.pdf]

## **Supplementary Information for**

**Self-adhesive epidermal carbon nanotube electronics for tether-free long-term continuous  
recording of biosignals**

Seung Min Lee, Hang Jin Byeon, Joong Hoon Lee, Dong Hyun Baek, Kwang Ho Lee, Joung Sook

Hong, Sang-Hoon Lee

*Supplementary Figures*

**Supplementary Figure S1. Penetration to the skin replica.** Penetrated CNT/aPDMS into various wrinkled surface of the skin replica made of PDMS.

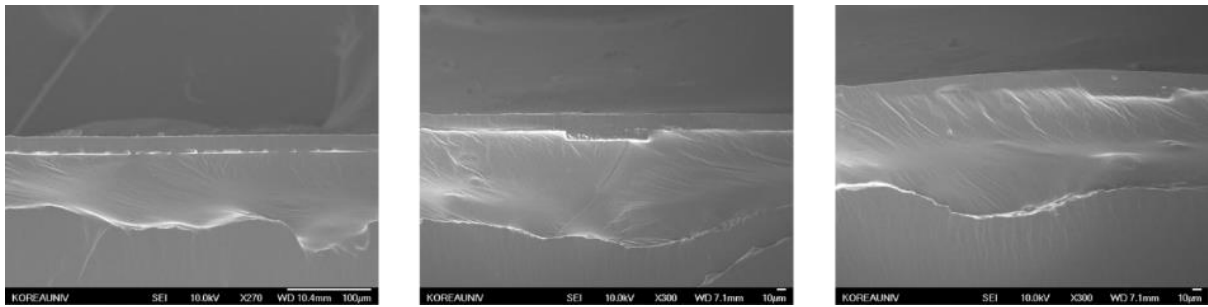

**Supplementary Figure S2. Fabrication of the skin replica.** (a) Dragon Skin was cast onto the chest then cured for 30 min to form a solid mold. (b) The cured Dragon Skin was peeled off the chest. (c) The mold was turned over and PDMS was poured onto it. (d) After curing for 2 hours in a 65°C oven, the PDMS skin replica was peeled off.

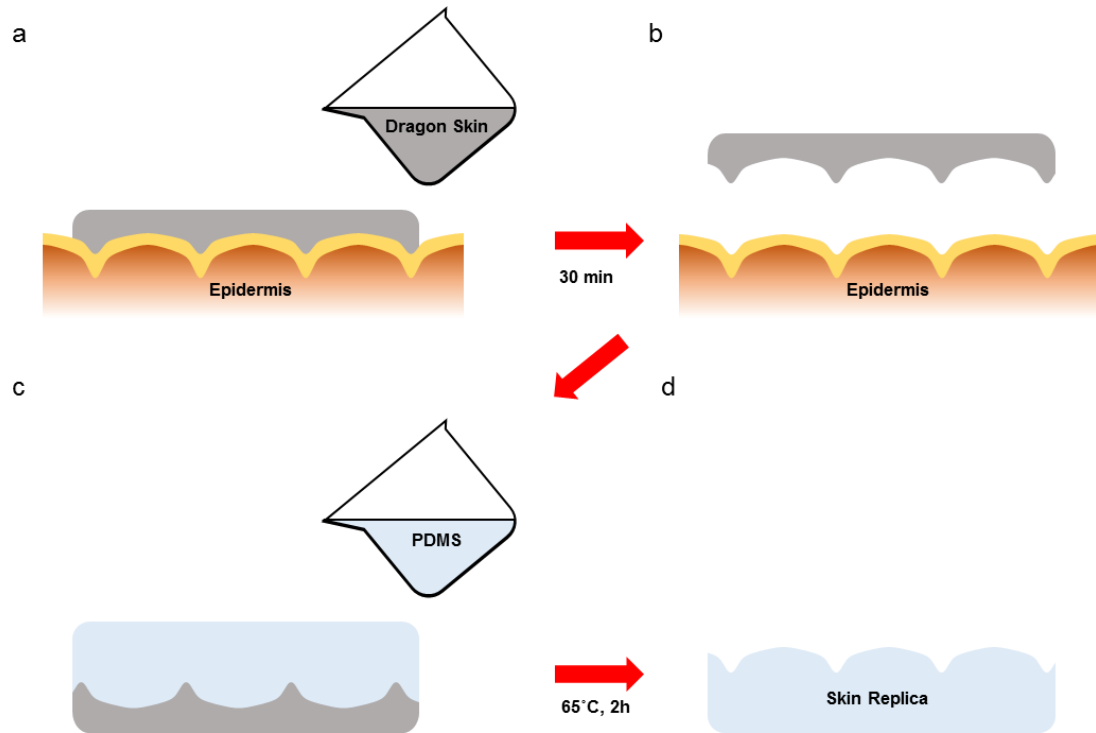

**Supplementary Figure S3. Protocol for the mixing of CNTs and adhesive PDMS.** (a) CNTs were placed in ethanol to prepare solvent-wet CNTs. (b) The solvent-wet CNTs were mixed with MG 7-9850A (5 wt%) then dispersed under shear flow stress induced with a home-made stirrer.

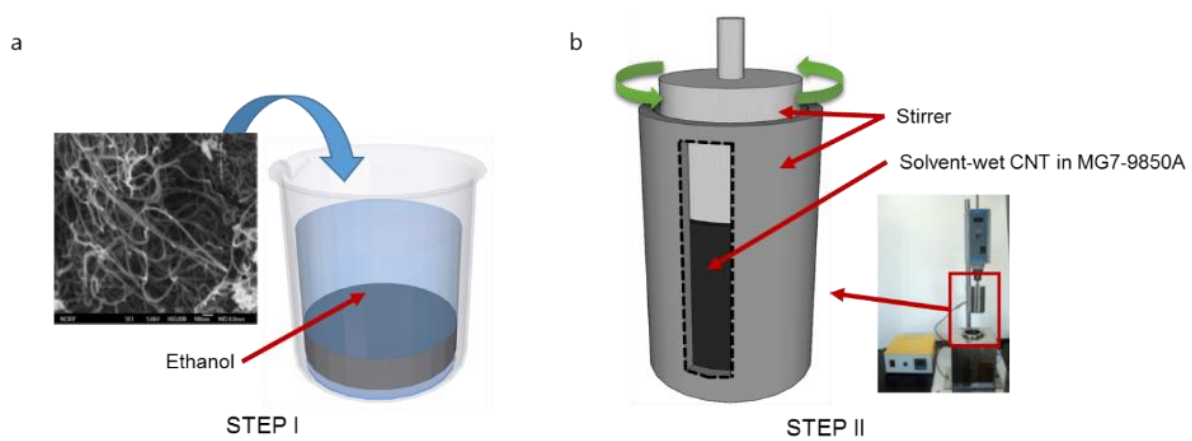

**Supplementary Figure S4. Chemical properties of CNT/aPDMS.** (a) FTIR results for aPDMS (blue) and CNT/aPDMS (red) indicate that there are no chemical changes when CNT is mixed into aPDMS. Images of 5  $\mu\text{L}$  water droplets on (b) aPDMS and (c) CNT/aPDMS. The contact angles are  $112^\circ$  and  $116^\circ$  respectively.

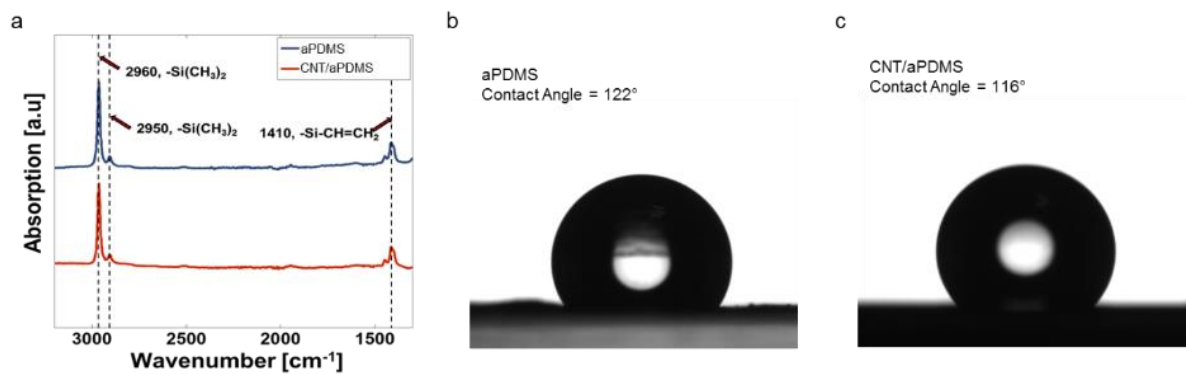

**Supplementary Figure S5. Penetration to the diverse shaped grooves of PDMS.** (a) Various groove-patterns for penetration test. (unit:  $\mu\text{m}$ ) (b) Microscope images of each patterns observed from bottom of the PDMS indicated all aPDMS was successfully penetrated and contacted.

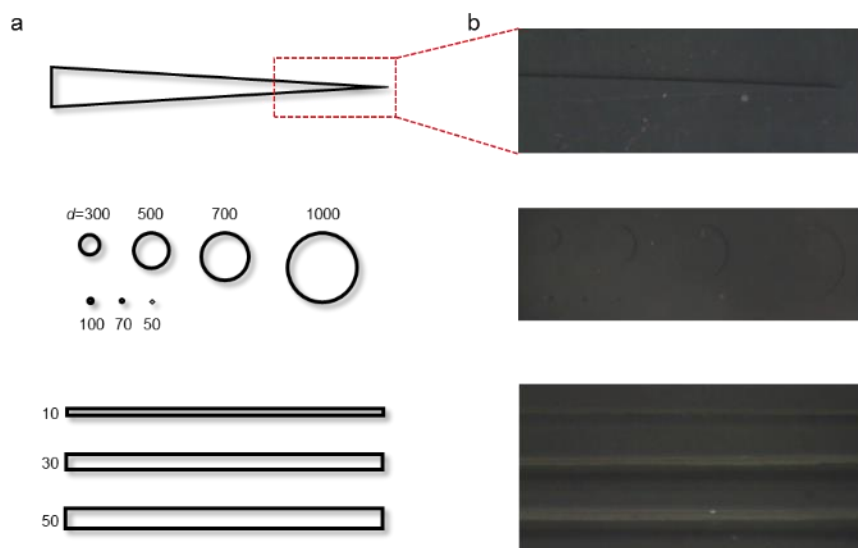

**Supplementary Figure S6. Impedance measurements protocol.** Experimental set-up for measuring the intrinsic impedance of CNT/aPDMS with (a) four and (b) three probes. The four-probe impedance is  $Z_C$ , and  $Z_{CM}$  was calculated by subtracting  $Z_C$  from the impedance measured with three probes.  $Z_{CE}$  was measured with the same protocol for the CNT/aPDMS, dry, and conventional Ag/AgCl electrodes in (c).

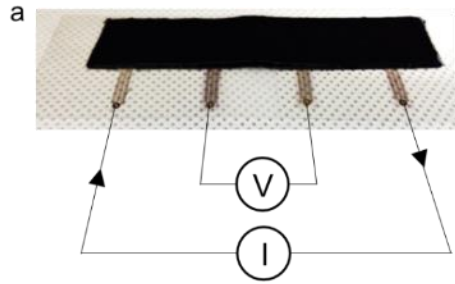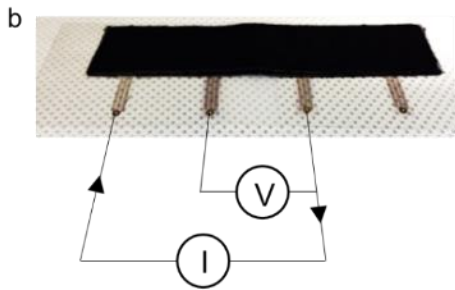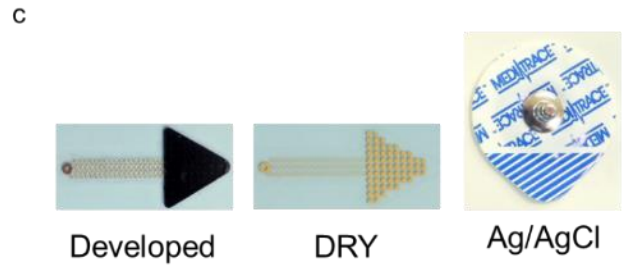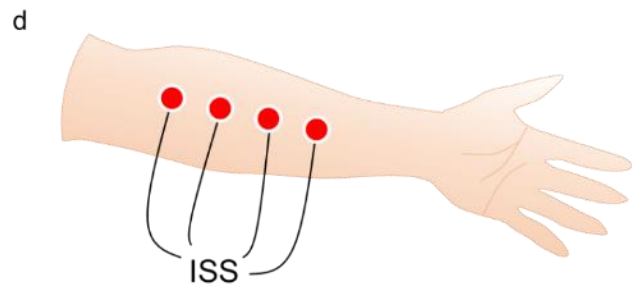

**Supplementary Figure S7. Strain test of CNT/aPDMS.** (a) Change of impedance of CNT/aPDMS according to applied strain and (b) repeating strain test by applying 30% tensile strain.

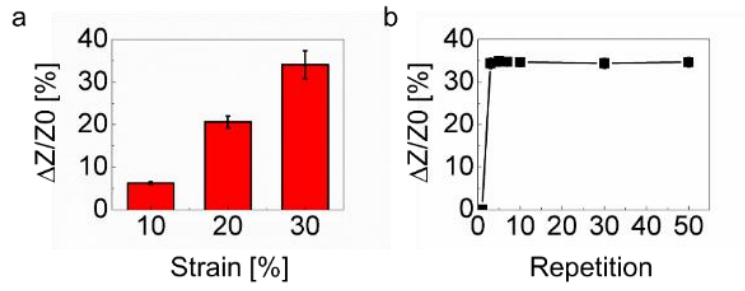



**Supplementary Figure S8. Stretching ratio of the skin.** The stretching ratio of the skin was determined for the following motions of the left arm: (a) forward, (b) lateral, (c) backward, and (d) upward. The location where the ECG electrode would be attached is enclosed by the white triangle.

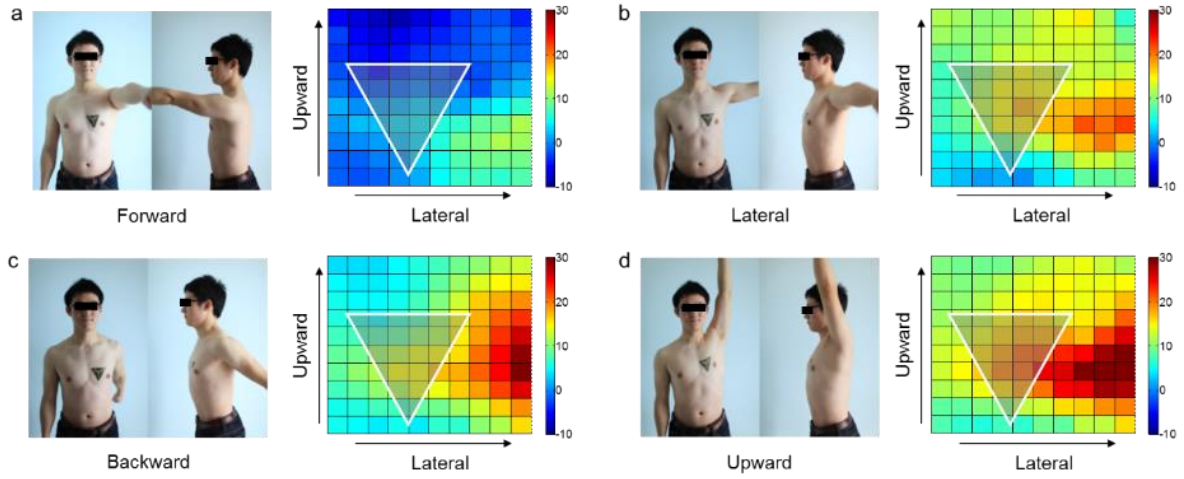

**Supplementary Figure S9. Electrode serpentine.** Assembly drawings of the serpentine: (a) ELE and (b) serpentine line (unit: mm). Optical images of (c) ELE and (d) serpentine line under strain stresses of 0, 15, and 30% in the x-direction.

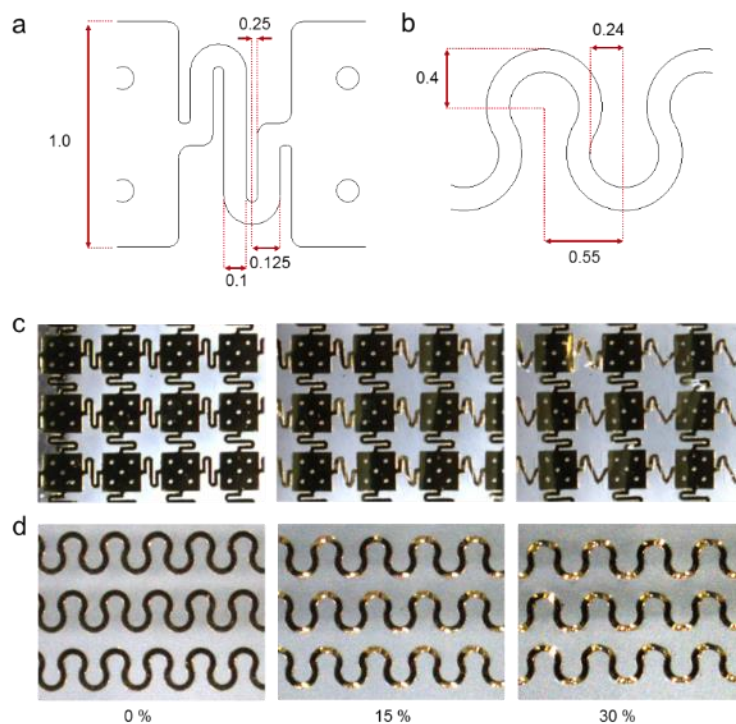

**Supplementary Figure S10. Solderable terminal.** (a) The Ni electroplating procedure. Electroplating was applied to the terminal with a hole, and the hole was covered with Ni to enable soldering. (b) FPCB with a preamplifier and a commercialized connector. (c) Cross-sectional view of the terminal and the FPCB.

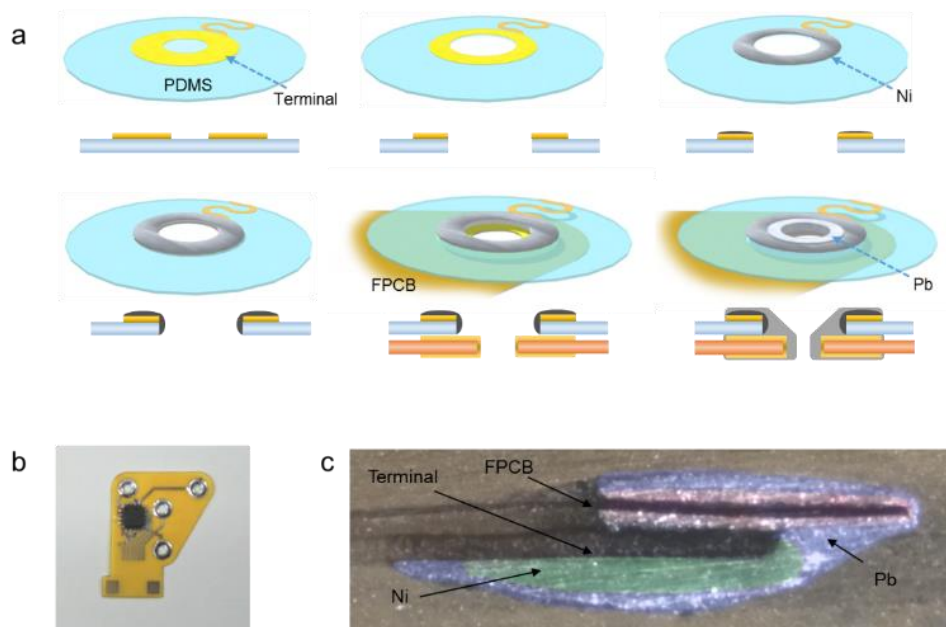

**Supplementary Figure S11. Data Acquisition System** (a) Block diagram of the designed signal acquisition module and (b) the fabricated PCB including amplifiers, filters, a microprocessor, and a Bluetooth module. (c) Real time data receiving program. (d) USB-type Bluetooth dongle.

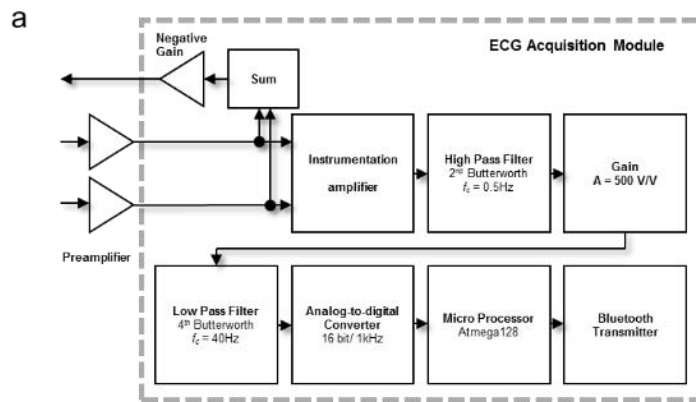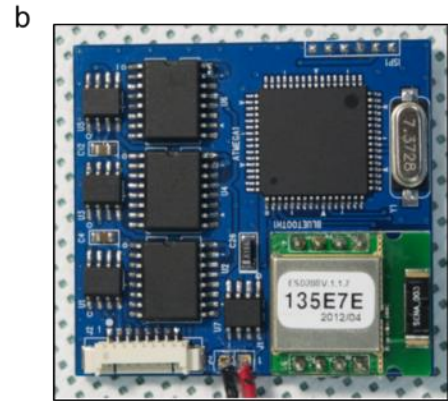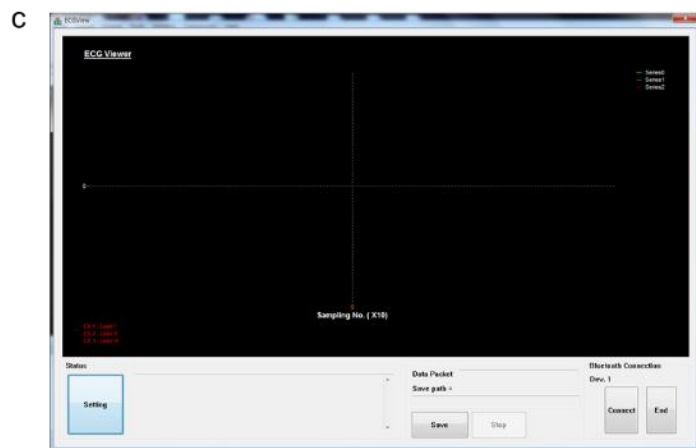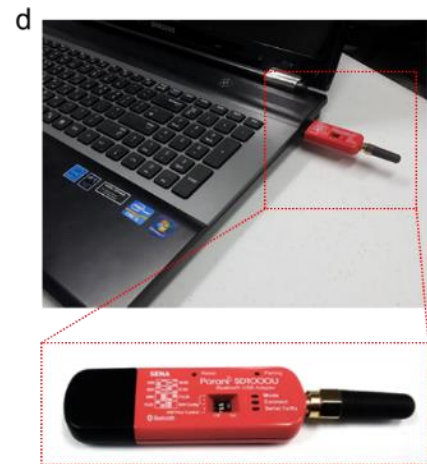

**Supplementary Figure S12. Reliability.** (a) ECG waveforms from Ag/AgCl, Dry, and CNT/aPDMS electrode according to the distance between electrodes. (b) ECG waveforms before and after 30 cycles of peel off process without any cleaning procedure.

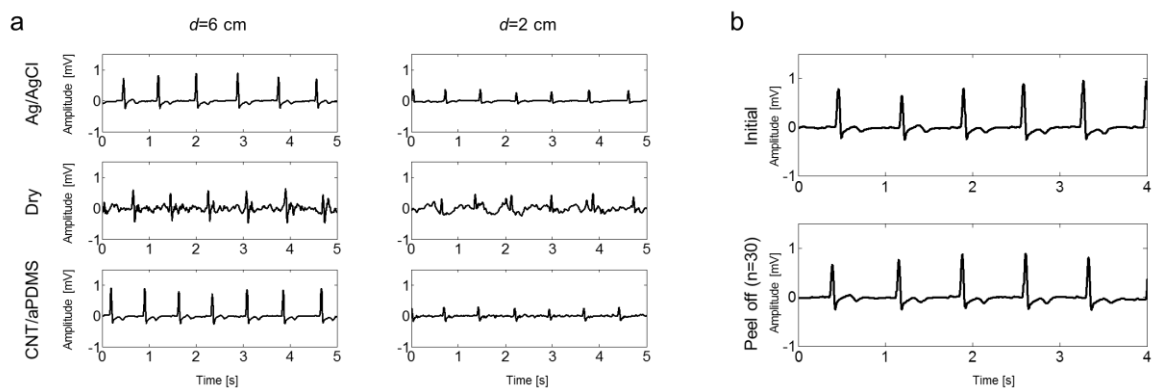

**Supplementary Figure S13. Accuracy test.** (a) Experimental set-up for ECG recordings from the ECG simulator attached to agarose gel. (b) ECG waveforms recorded with Ag/AgCl and CNT/aPDMS electrodes.

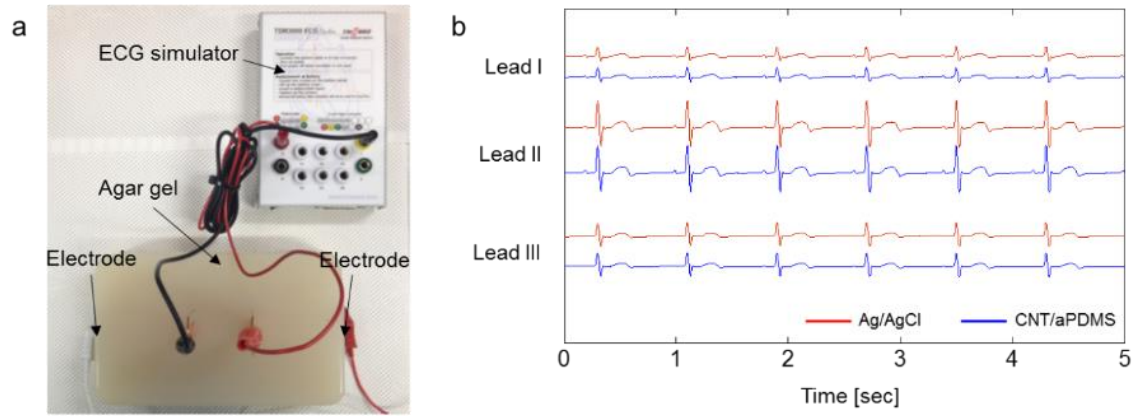

**Supplementary Figure S14. Waterproof test.** (a) Part of the CNT/aPDMS electrode was attached to the arm of a subject and blue-colored water was poured over it and rubbed in with a finger. (b) The water did not penetrate the area in contact with the CNT/aPDMS electrode. (c) Schematic diagrams of a normal dry electrode and a soft and self-adhesive electrode attached to skin and exposed to water.

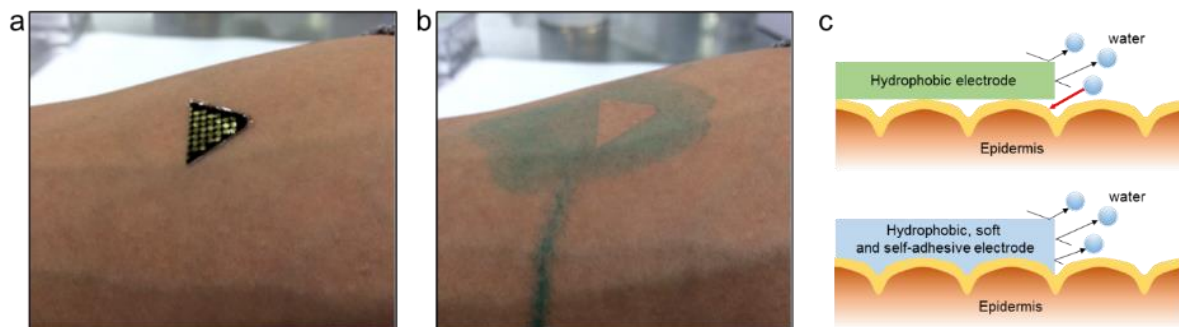

**Supplementary Figure S15. Biocompatibility test.** (a) Cytotoxicity test using human fibroblast cells. Most cells are alive (green) although there are a few dead cells (red). (b) The result of CCK test for day 1, 3, and 7. (c) Skin compatibility was confirmed by placing the CNT/aPDMS electrode on the chest of a subject continuously for a week, after which time the skin under the electrode was found to be normal.

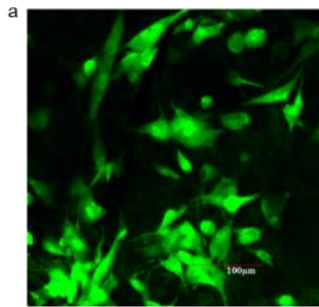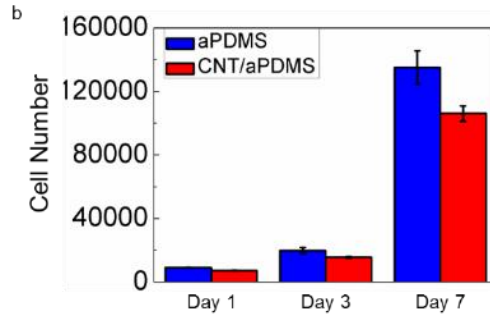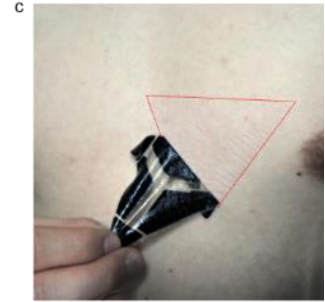



**Supplementary Figure S16. Long-term measurement.** ECG waveforms of the first day, a week later, and after the cleaning procedure.

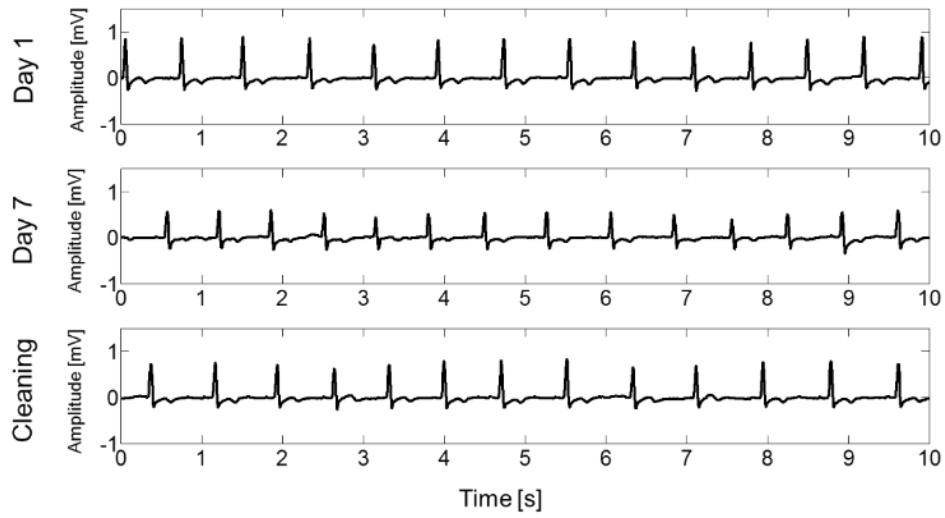

**Supplementary Figure S17. Other biosignals.** (a) Horizontal EOG recording for three left and right seeing. (b) EMG recording from an arm during fist clenching and releasing.

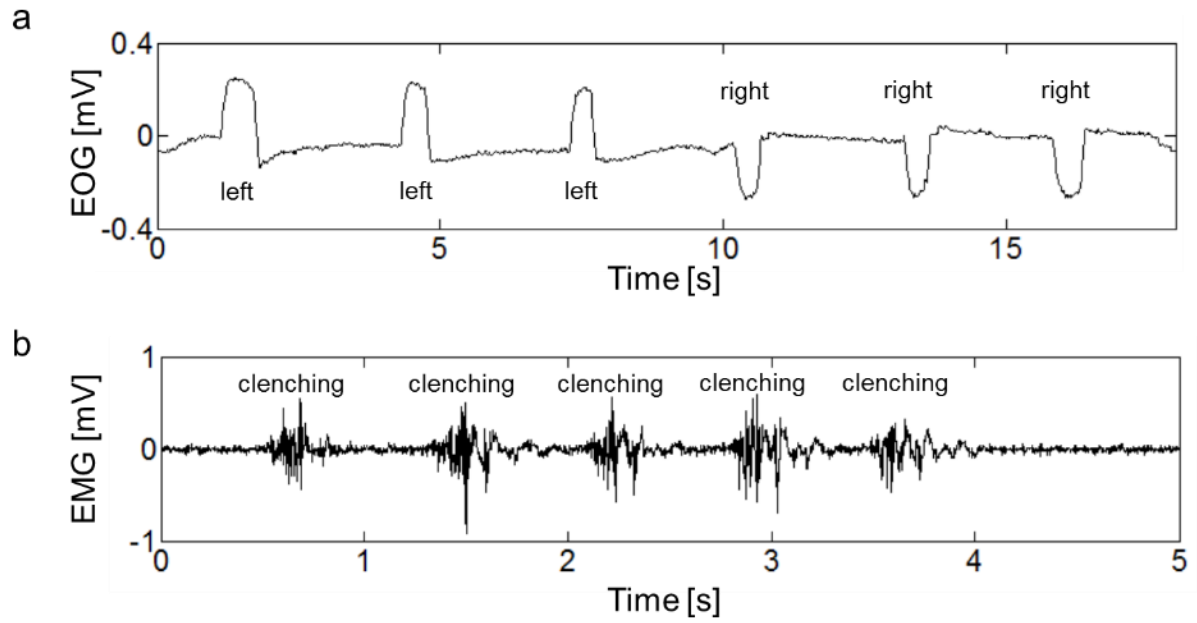

### *Legends of Videos*

**Video S1: Waterproof test.** By attaching part of ECG patch to the forearm blue-colored water was stained. After rubbing with a finger several times, water was removed by a tissue and the electrode was peeled off. The water did not penetrate where the electrode was attached.

**Video S2: ECG measurement in a water-filled bath.** Wearing the ECG patch, a subject entered water-filled bath and ECG signal was recorded.
